# Supplementary material for: Glutathione-conjugating and membrane-remodeling activity of GDAP1 relies on amphipathic C-terminal domain
Source: PubMed Central journal article supplement (PMC5107993; doi:10.1038/srep36930), 2016-11-14
Supplement: srep36930-s1.pdf [file srep36930-s1.pdf]

**Glutathione-conjugating and membrane-remodeling activity of GDAP1  
relies on amphipathic C-terminal domain**

Nina Huber, Christoph Bieniossek, Konstanze Marion Wagner, Hans-Peter  
Elsässer, Ueli Suter, Imre Berger, and Axel Niemann

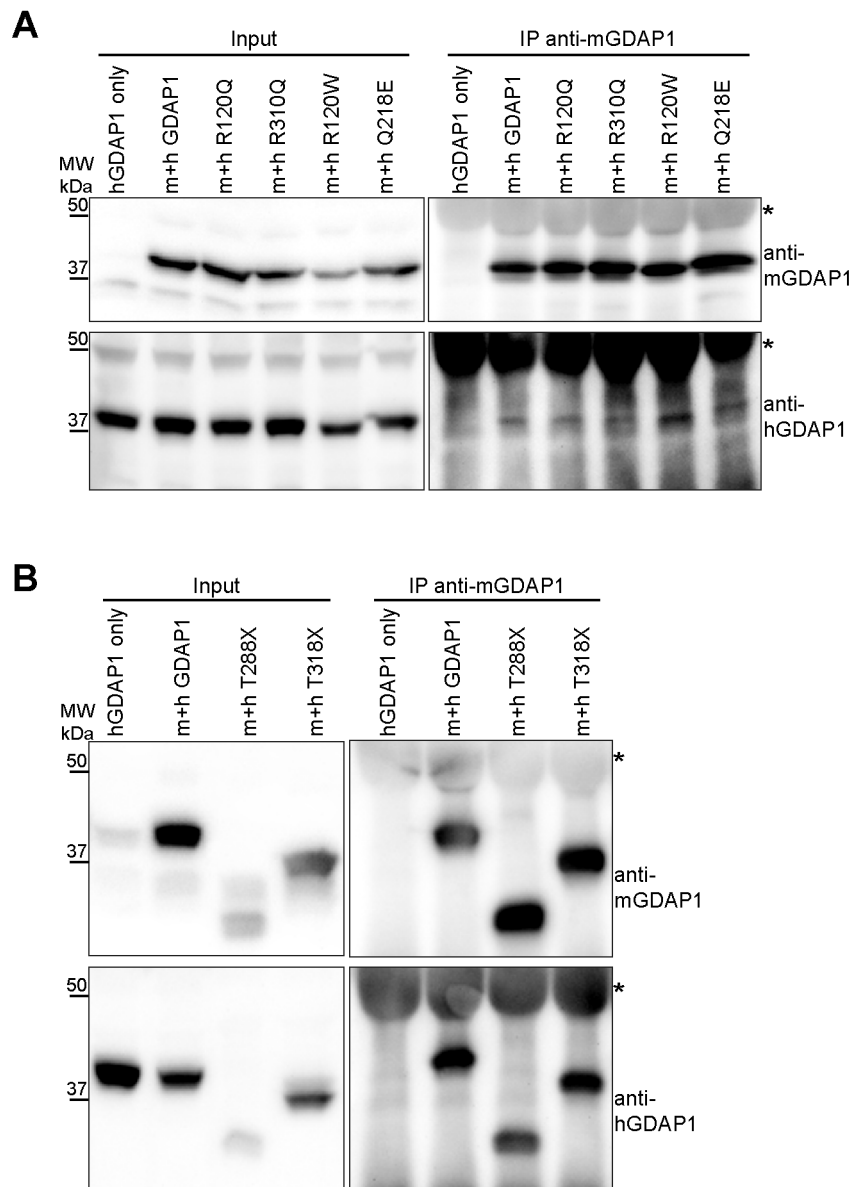

**Supplementary Figure S1: CMT-associated mutant forms of GDAP1 do not impair dimerization.** (A, B) Immunoprecipitations performed with the mouse-specific anti-GDAP1 antibody co-precipitate the corresponding human isoform from co-transfected HEK-293T cells. In the negative control, the human GDAP1 is not precipitated with the mouse-specific anti-GDAP1 antibody in the absence of murine GDAP1. (IP: immunoprecipitation, \*: IgG heavy chain).

**Supplementary Table S1: Assay conditions for spectrophotometric GST-activity assays**

| <b>Substrate<br/>(Company)</b>                                        | <b>Substrate<br/>mM</b> | <b>GSH<br/>mM</b> | <b>Buffer</b>                      | <b>Wavelength<br/>nm</b> | <b>Extinction<br/>coefficient<br/>mM<sup>-1</sup>cm<sup>-1</sup></b> |
|-----------------------------------------------------------------------|-------------------------|-------------------|------------------------------------|--------------------------|----------------------------------------------------------------------|
| 1-Chloro-2,4-dinitrobenzene<br>(CDNB) (Sigma)                         | 1                       | 2                 | 0.1 M KPo<br>(pH 6.5)              | 340                      | 9.6                                                                  |
| <i>p</i> -Nitrophenylacetate ( <i>p</i> NPA)<br>(Sigma)               | 1                       | 5                 | KPo<br>(pH 6.5)                    | 400                      | 8.3                                                                  |
| <i>p</i> -Nitrobenylchloride ( <i>p</i> NBC)<br>(Fluka)               | 0.25                    | 5                 | KPo<br>(pH 6.5)                    | 310                      | 1.9                                                                  |
| Ethacrynic acid (EA) (Sigma)                                          | 0.2                     | 0.25              | KPo<br>(pH 6.5)                    | 270                      | 5                                                                    |
| 7-Chloro-4-nitrobenzo-2-oxa-<br>1,3-diazol (Sigma)                    | 0.2                     | 0.5               | NaAc<br>(pH 5.0)                   | 419                      | 14.5                                                                 |
| 1,2-Epoxy-3-(4-<br>nitrophenoxy)propane (EPNP)<br>(Fisher Scientific) | 2                       | 5                 | KPo<br>(pH 6.5)                    | 360                      | 0.5                                                                  |
| Cumene hydroperoxide<br>(Cayman)                                      | n.d.                    | n.d.              | 50mM Tris<br>(pH 7.6),<br>5mM EDTA | 340                      | 6.22                                                                 |
| <i>t</i> -buthyl hydroperoxide (Fluka)                                | n.d.                    | n.d.              | 50mM Tris<br>(pH 7.6),<br>5mM EDTA | 340                      | 6.22                                                                 |

*KPo*: potassium phosphate buffer; *NaAc*: sodium acetate buffer; *n.d.*: not declared in assay kit
